# Supplementary material for: Phosphoinositides regulate the TCR/CD3 complex membrane dynamics and activation
Source: PubMed Central journal article supplement (PMC5862878; doi:10.1038/s41598-018-23109-8), 2018-03-21
Supplement: 41598_2018_23109_MOESM1_ESM.pdf [file 41598_2018_23109_MOESM1_ESM.pdf]

## Supplementary Information

### Phosphoinositides regulate the TCR/CD3 complex membrane dynamics and activation

Nassima Chouaki Benmansour<sup>1</sup>, Kilian Ruminski<sup>1</sup>, Anne-Marie Sartre<sup>1</sup>, Marie-Claire Phelipot<sup>1</sup>, Audrey Salles<sup>1,5</sup>, Elise Bergot<sup>1</sup>, Ambroise Wu<sup>1</sup>, Gaëtan Chicanne<sup>2</sup>, Mathieu Fallet<sup>1</sup>, Sophie Brustlein<sup>1</sup>, Cyrille Billaudeau<sup>1,6</sup>, Anthony Formisano<sup>1</sup>, Sébastien Mailfert<sup>1</sup>, Bernard Payrastra<sup>2,3</sup>, Didier Marguet<sup>1</sup>, Sophie Brasselet<sup>4</sup>, Yannick Hamon<sup>1</sup> & Hai-Tao He<sup>1</sup>

<sup>1</sup> Aix Marseille Univ, CNRS, INSERM, CIML, Centre d'Immunologie de Marseille-Luminy, Marseille, France

<sup>2</sup> Institut des Maladies Métaboliques et Cardiovasculaires, Inserm U1048, Université Toulouse 3, Toulouse, France

<sup>3</sup> Laboratoire d'Hématologie, Centre Hospitalier Universitaire de Toulouse, Toulouse, France

<sup>4</sup> Aix-Marseille Univ, CNRS, Centrale Marseille, Institut Fresnel, UMR 7249, 13397 Marseille, France

<sup>5</sup> Current address: UTechS Photonic BioImaging (Imagopole) Citech, Institut Pasteur, Paris, 75015, France

<sup>6</sup> Current address: Micalis Institute, INRA, AgroParisTech, Université Paris-Saclay, 78350 Jouy-en-Josas, France

Yannick Hamon & Hai-Tao He contributed equally to this work. Correspondence and requests for materials should be addressed to Y.H. (hamon@ciml.univ-mrs.fr) or H.-T.H. (he@ciml.univ-mrs.fr)

The Supplementary Information includes six supplementary figures (Figures S1 – S6) and one supplementary table (Table S1).

Figure S1

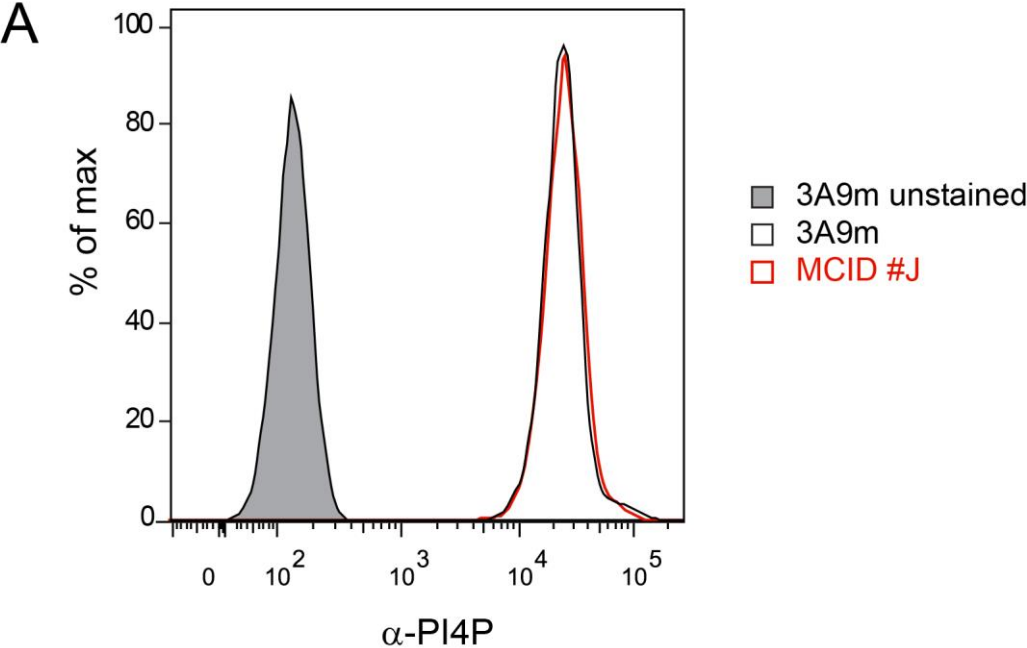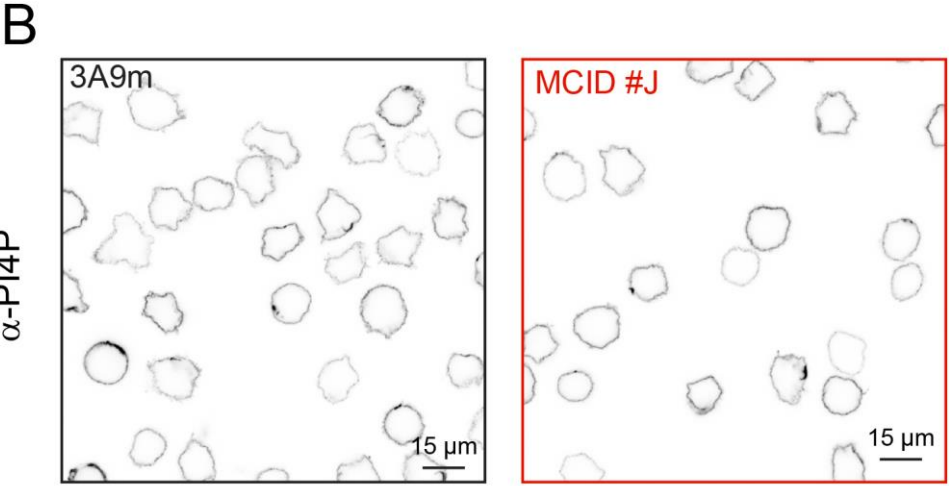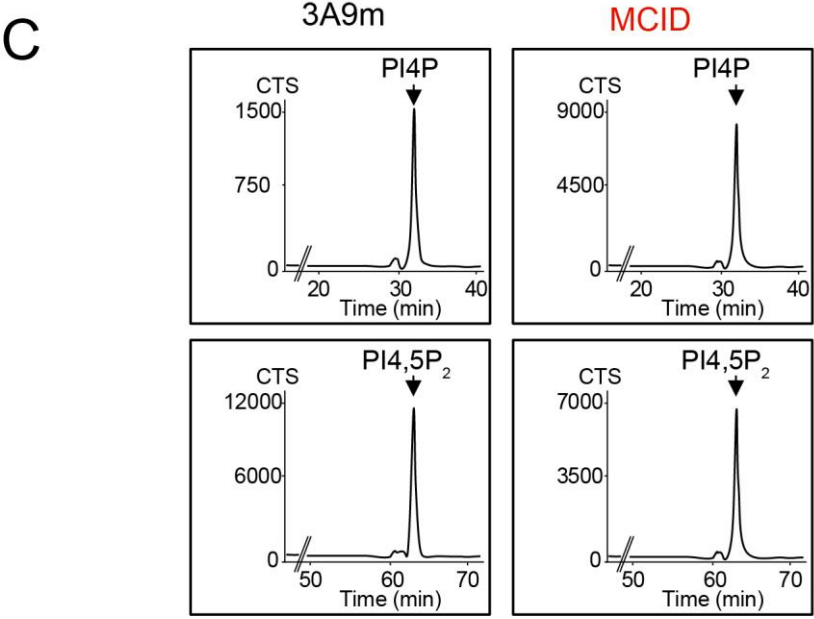

***Figure S1: Analysis of PI4P levels upon MCID expression***

**(A)** Flow cytometry analysis of the PI4P PM level in 3A9m and MCID #J cells, respectively. The unstained control is shown in gray.

**(B)** Confocal images of the anti-PI4P mAb labelled cells in (A).

**(C)** HPLC profile of PI4P and PI(4,5)P<sub>2</sub> extracted from [<sup>32</sup>Pi]-orthophosphate labelled 3A9m WT and MCID cells, respectively (see Methods for details).

Figure S2

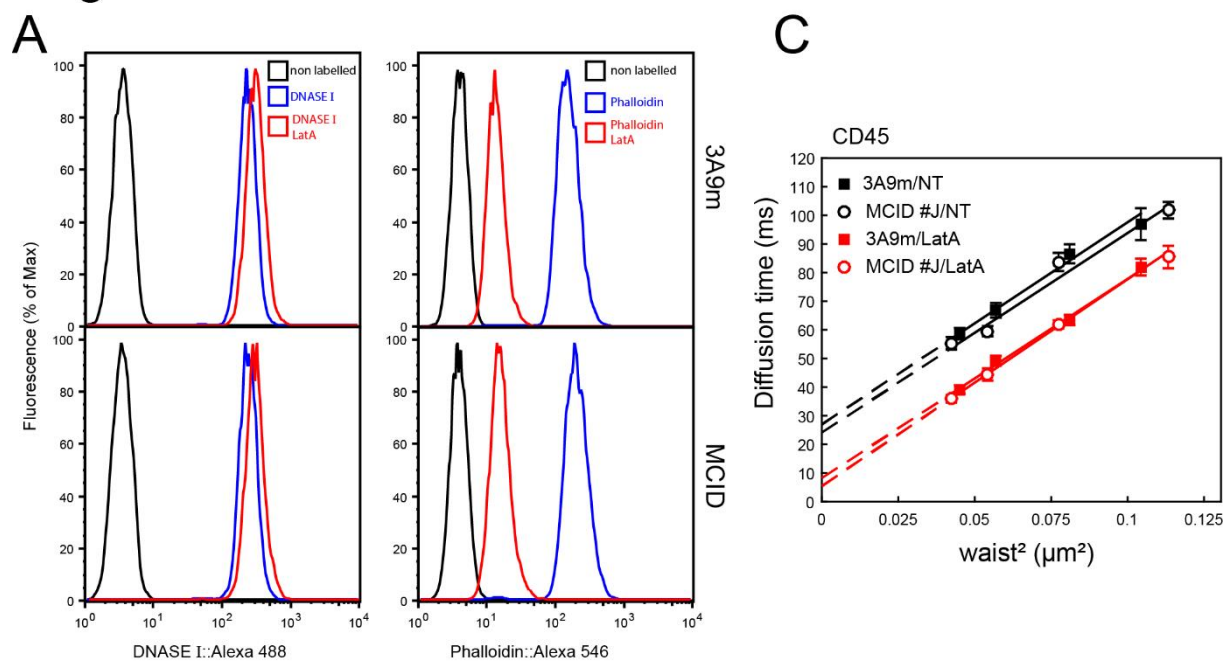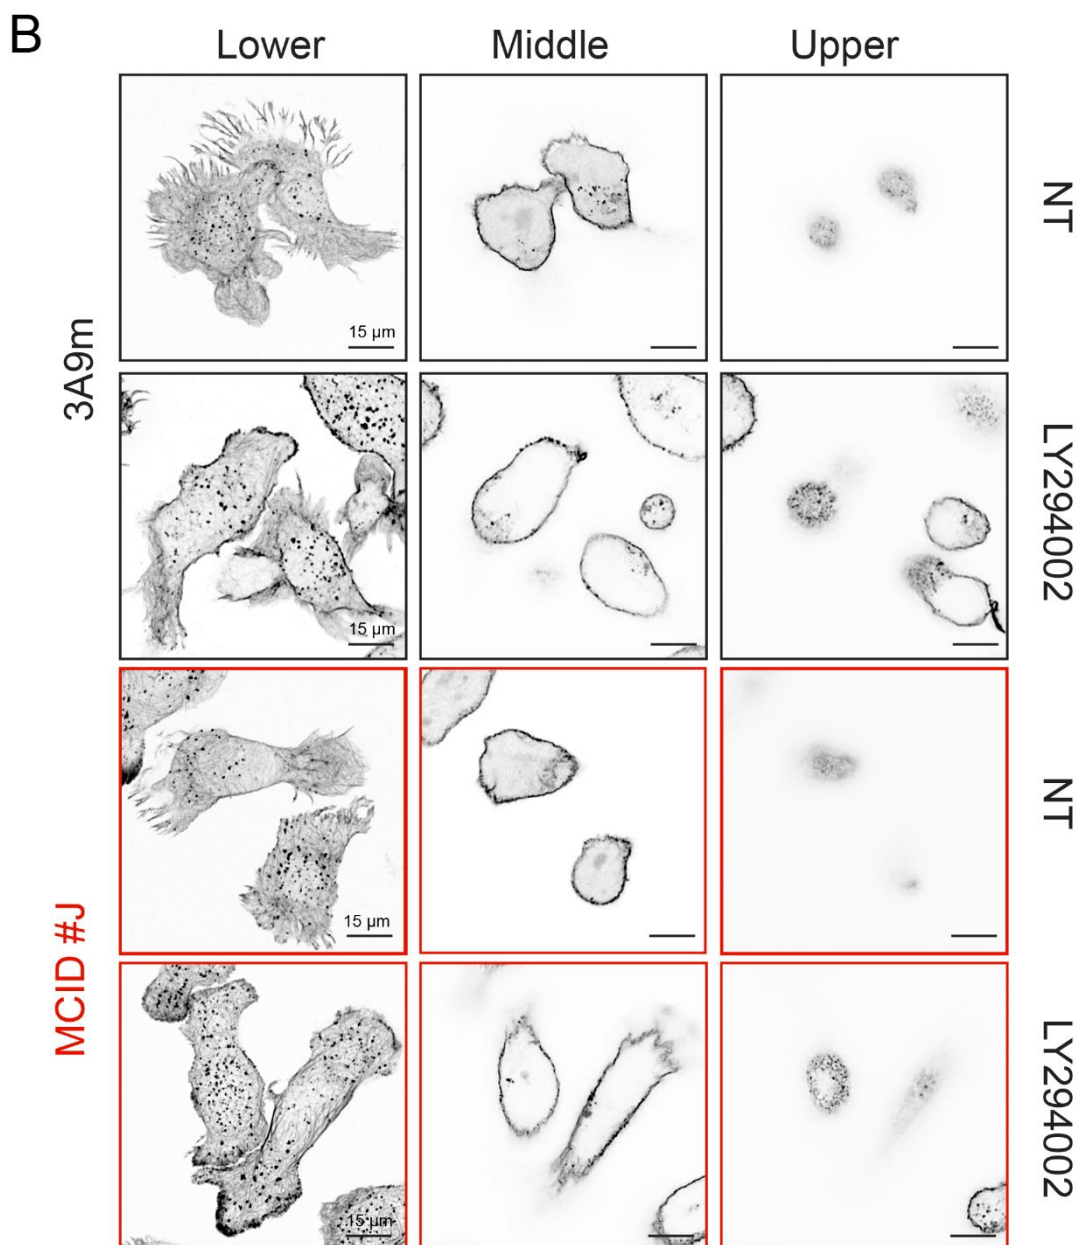

**Figure S2: The MCID expression minimally affects the organization of the F-actin cortex**

**(A)** Flow cytometry analysis with Alexa 488-conjugated DNASE 1 (left panels) and Alexa 546-conjugated phalloidin (right panels) of the untreated (in blue) or Latruncunlin A (that induces actin depolymerization, 2.5 $\mu$ M) treated (in red) 3A9m WT or MCID cells, respectively.

**(B)** Super-resolution microscopy of the actin cytoskeleton architecture of the antibody-immobilized 3A9m or MCID #J cells, treated or not with PI3K inhibitor LY294002 before being stained with Alexa 647-conjugated phalloidin and imaged by the confocal microscopy enhanced with airyscan technology. Lower, middle and upper optical sections are shown from a Z-stack acquisition (see Methods for details). These data, together with those shown in (A), depicted an overall preserved actin cortex architecture upon MCID expression. In addition, no difference in the actin cortex organization could be found between 3A9m and MCID #J cells after inhibition of the PI3K activity to deplete PI(3,4,5)P3.

**(C)** svFCS analysis of the PM lateral diffusion of CD45 labelled with Alexa 488::H193.16.3 Fab, in non-treated (in black) and Latruncunlin A-treated (in red) 3A9m or MCID #J cells, respectively. The lateral diffusion of CD45 in the PM of T cells is known to be constrained by the cortical actin cytoskeleton<sup>1</sup>. The highly sensitive svFCS technique<sup>2,3</sup> in combination with Latruncunlin A treatment allowed establishing that the F-actin-constrained lateral diffusion for CD45 was unchanged upon MCID expression, indicating a normal cortical actin cytoskeleton in the MCID-expressing cells (see Methods for the details of svFCS analysis).

Figure S3

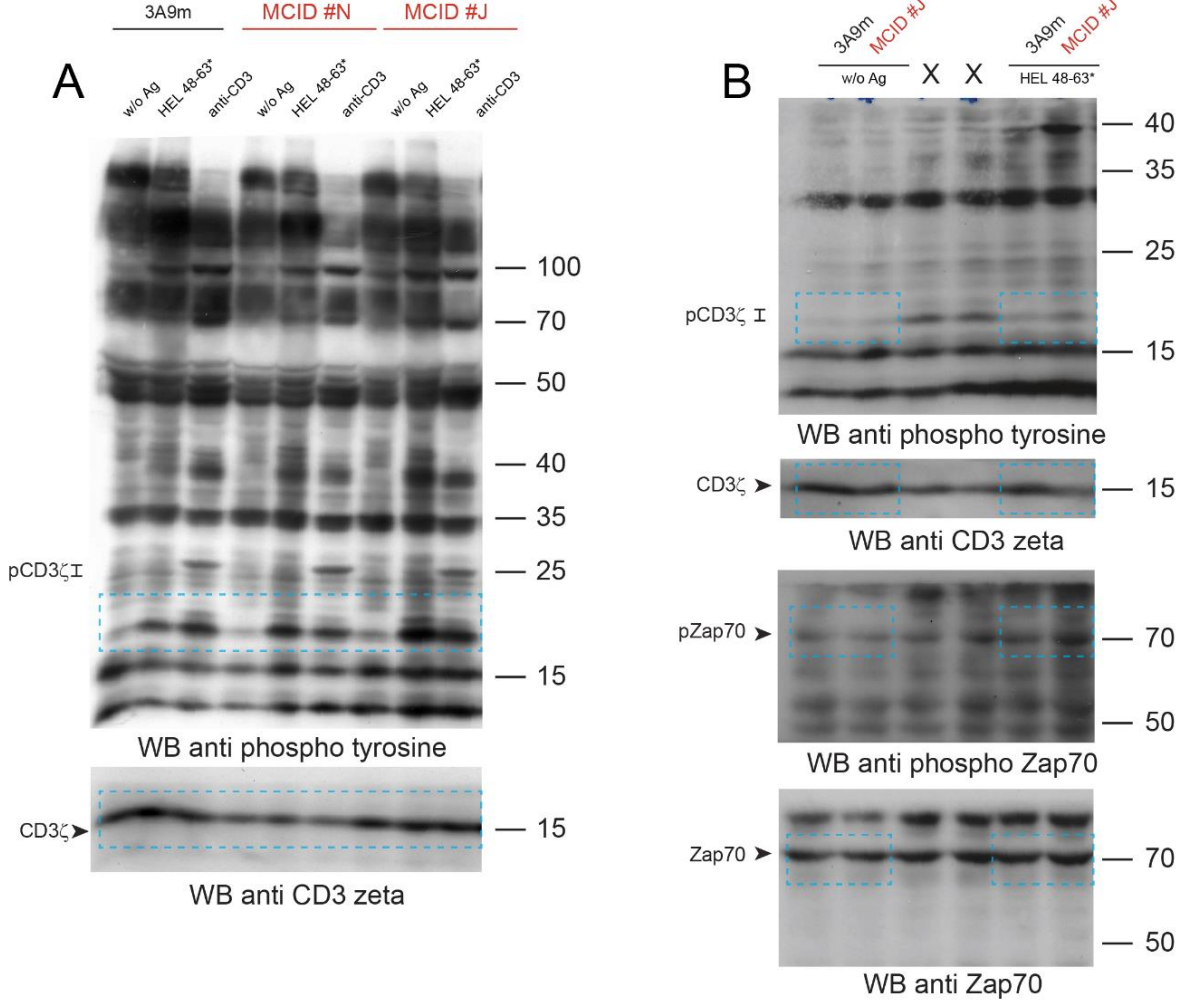

Figure S3: Uncropped images of immunoblots shown in Figure 2

(A) 3A9m mock-transfected WT cells or MCID #N or #J clones were seeded onto COS-A<sup>k</sup> or COS-A<sup>k</sup><sub>48-63\*</sub> cells, or incubated with soluble anti-CD3ε mAb (145-2C11, 10 μg/ml), for 5 min at 37°C. Cell lysates were immunoblotted with an anti-p-Tyr mAb (4G10) to detect the phosphorylated isoforms of CD3ζ (p21 and p23). The bottom portion of the blot was stripped and reprobed with an anti-CD3ζ antibody to detect the (p16) CD3ζ molecule.

(B) The experiment was carried out same as that in (A), except that only the lower portion of the blot was analyzed with anti-p-Tyr mAb to detect the phosphorylated isoforms of CD3ζ (p21 and p23), while the upper portion of the blot was analyzed with an anti-p-Zap-70 antibody to detect phosphorylation of Zap-70 (pTyr 319). The bottom portion of the blot was stripped and

reprobed with an anti-CD3 $\zeta$  antibody to detect the (p16) CD3 $\zeta$  molecule. The upper portion of the blot was stripped and reprobed with an anti-Zap-70 mAb to detect the Zap-70 molecule.

Figure S4

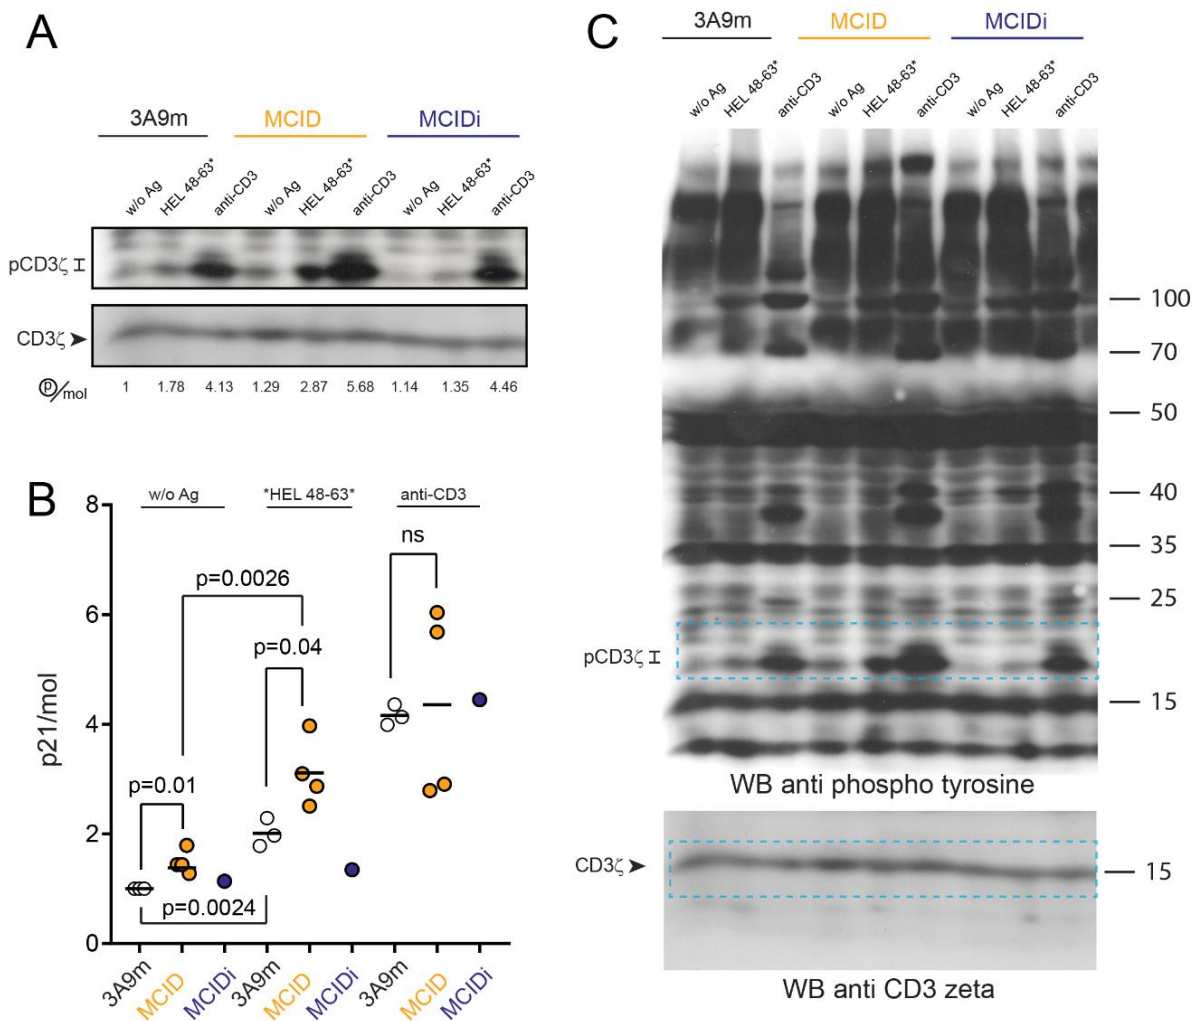

**Figure S4: The increased TCR activation upon MCID expression**

(A) 3A9m WT, MCID or MCIDi cells were seeded onto COS-A<sup>k</sup> or COS-A<sup>k</sup><sub>48-63\*</sub> cells, or incubated with anti-CD3ε mAb (145-2C11, 10 μg/ml) for 5 min at 37°C. Cell lysates were immunoblotted with an anti-p-Tyr mAb (4G10) to detect the phosphorylated isoforms of CD3ζ (p21 and p23). The bottom portion of the blot was stripped and reprobbed with an anti-CD3ζ antibody to detect the (p16) CD3ζ molecule.

(B) Statistical analysis of the p21/CD3ζ ratio from 3 independent immunoblots performed as in (A) for 3A9m, MCID and MCIDi quantification in (A) is plotted as a control.

(C) Uncropped version of the immunoblots shown in (A).



Figure S5

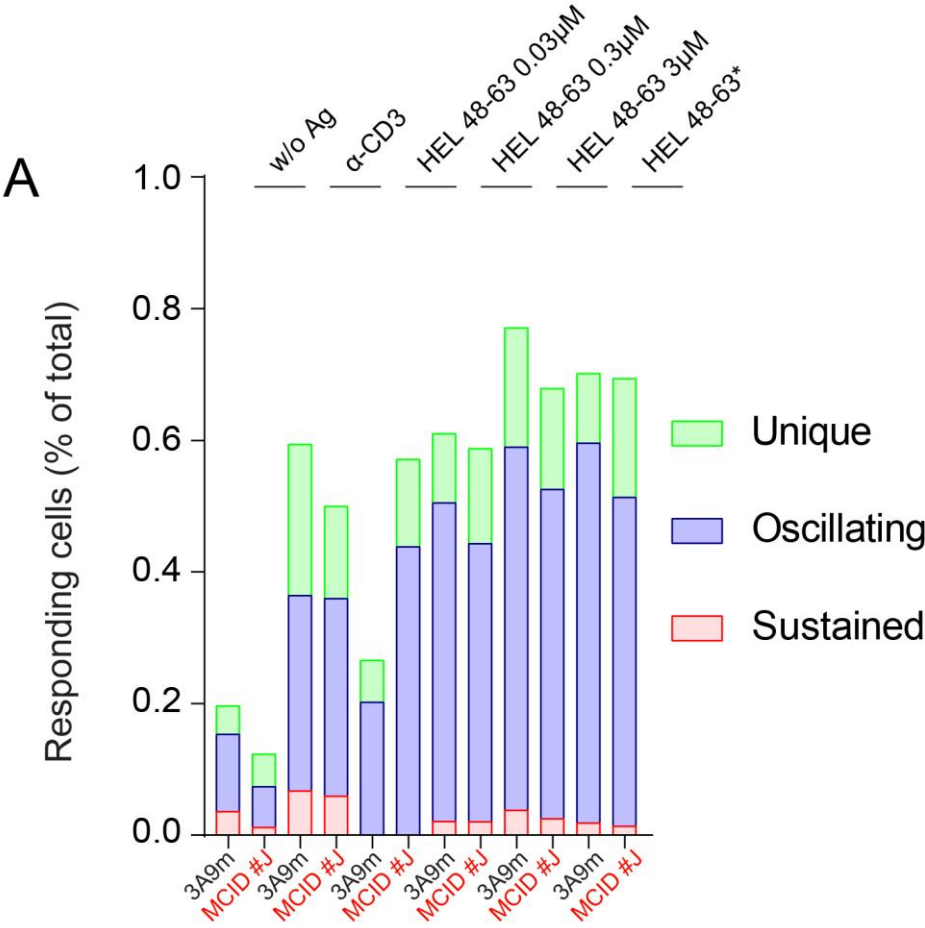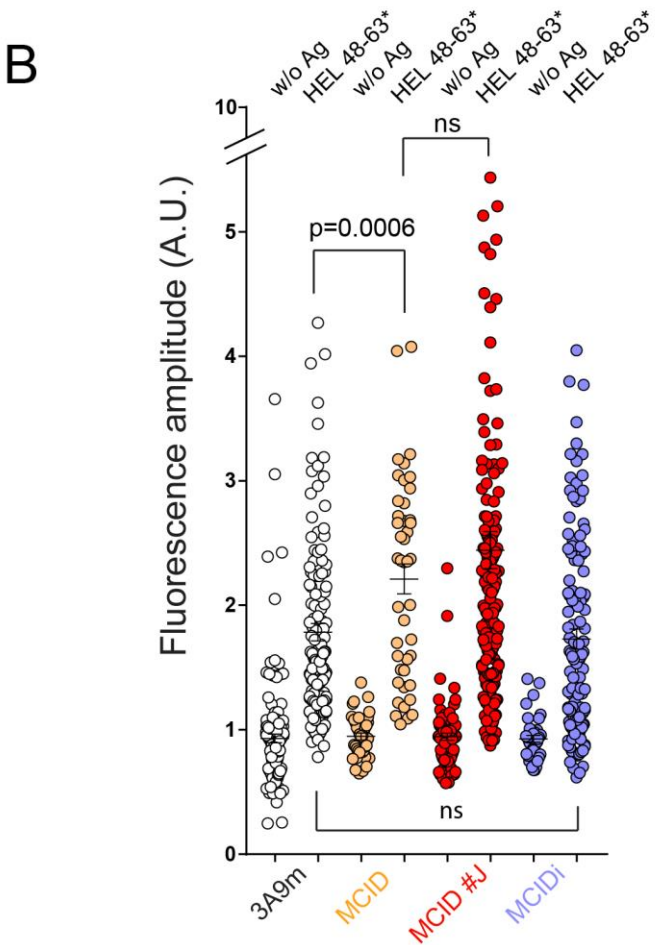

***Figure S5: The increased TCR-mediated Ca<sup>2+</sup> store release upon MCD expression***

**(A)** Percentage of cells over the activation threshold in the calcium imaging experiment of Fig. 2d.

**(B)** Comparative analysis of the fluorescence amplitude of individual cells over the threshold in 3A9m WT, 3A9m MCID, MCID #J and MCIDi cells upon incubation with COS-A<sup>k</sup> cells or COS-A<sup>k</sup><sub>48-63</sub>\*.

## Figure S6

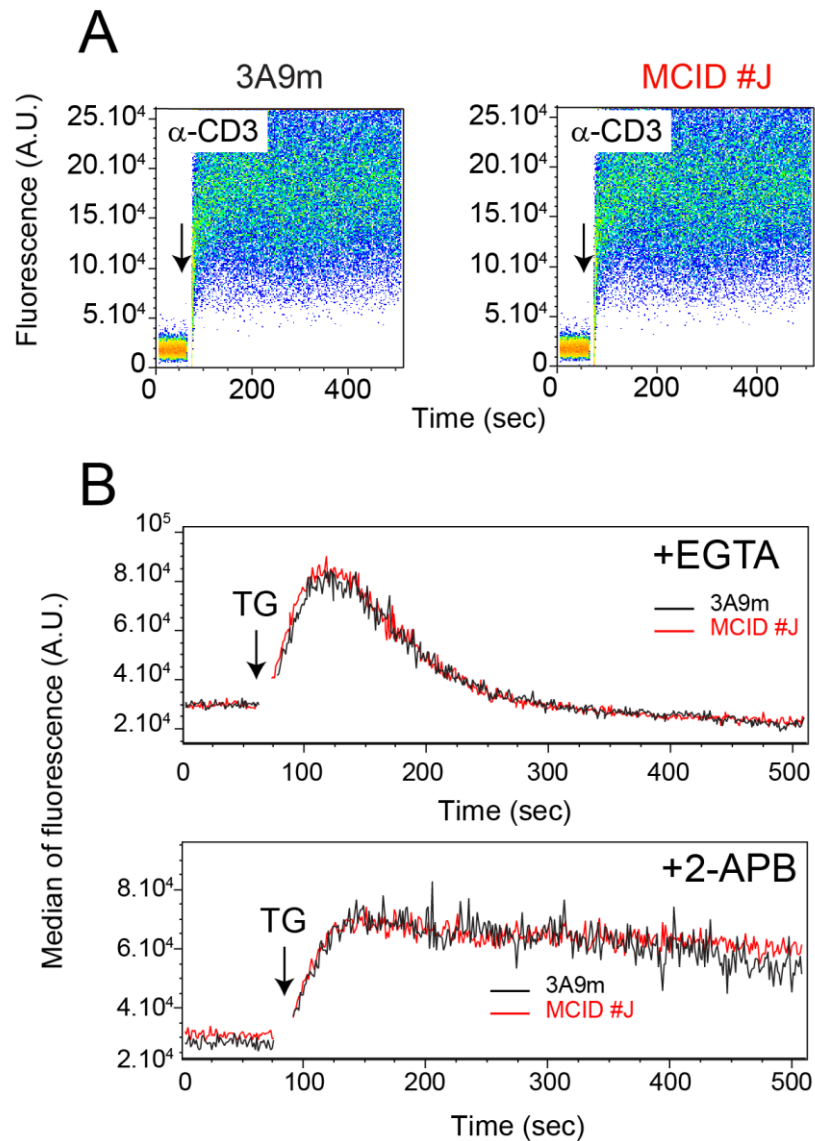

**Figure S6: Flow cytometry analysis of soluble anti-CD3 mAb binding and the  $Ca^{2+}$  store release stimulated by thapsigargin**

(A) Alexa 488-conjugated anti-CD3 $\epsilon$  mAb binding kinetics on 3A9m (left panel) or MCID #J (right panel) cells were analyzed by flow cytometry and plotted over time as indicated in Methods. Autofluorescence was recorded for 1 min (and considered as the baseline) prior to addition of soluble fluorescent anti-CD3 $\epsilon$  mAb (5  $\mu$ g/ml).

(B) Calcium mobilization response upon stimulation with thapsigargin. Cells were stimulated upon addition of 0.1  $\mu$ M thapsigargin (arrow) in the presence of 1 mM EGTA (upper panel) or 10  $\mu$ M 2-APB (lower panel). Median of fluorescence are expressed as a function of time.



**Table S1: Summary of molecular biology constructs used in this study.**

The sequence, the cloning strategy, the type of vector and the amplification matrix are summarized for each oligo corresponding to different constructs cited in this article.

## **Supplementary references**

1. Cairo, C.W. et al. Dynamic regulation of CD45 lateral mobility by the spectrin-ankyrin cytoskeleton of T cells. *J Biol Chem* **285**, 11392-401 (2010).
2. He, H.T. & Marguet, D. Detecting nanodomains in living cell membrane by fluorescence correlation spectroscopy. *Annu Rev Phys Chem* **62**, 417-36 (2011).
3. Blouin, C.M. et al. Glycosylation-Dependent IFN-gammaR Partitioning in Lipid and Actin Nanodomains Is Critical for JAK Activation. *Cell* **166**, 920-34 (2016).
